# Supplementary material for: Integrative machine learning analysis of multiple gene expression profiles in cervical cancer
Source: PeerJ. 2018 Jul 25;6:e5285. doi: 10.7717/peerj.5285 (PMC6064203; doi:10.7717/peerj.5285)
Supplement: Appendix S2 [file peerj-06-5285-s002.xlsx]

## Sheet: Sheet1
Gene expression dataset of combined dataset
ID_REF	GSM246087	GSM246088	GSM246089	GSM246090	GSM246119	GSM246120	GSM246121	GSM246122	GSM246123	GSM247650	GSM247651	GSM247652	GSM247653	GSM247654	GSM247655	GSM247656	GSM247657	GSM247658	GSM247659	GSM247660	GSM247661	GSM247662	GSM247663	GSM247856	GSM247857	GSM247859	GSM247860	GSM247862	GSM247864	GSM247865	GSM247866	GSM247876	GSM247877	GSM247878	GSM247879	GSM247881	GSM247882	GSM247883	GSM247884	GSM247885	GSM247886	GSM247887	GSM1551411_Cancer-01_U133_Plus2	GSM1551412_Cancer-02_U133_Plus2	GSM1551413_Cancer-03_U133_Plus2	GSM1551414_Cancer-04_U133_Plus2	GSM1551415_Cancer-05_U133_Plus2	GSM1551416_Cancer-06_U133_Plus2	GSM1551417_Cancer-07_U133_Plus2
209720_s_at	8.49271	5.44912	4.15145	5.42598	3.59744	8.37868	3.52113	3.46294	3.5755	10.0573	9.89335	9.8502	10.8703	8.91226	9.06725	7.281	9.90243	9.78244	6.29698	10.2567	9.00372	10.0336	9.50002	10.043	9.68266	10.0252	9.36687	9.74222	10.1408	9.91772	7.00837	5.37435	3.17883	3.94315	3.38194	10.3027	8.78735	9.94198	6.20042	8.20928	8.17037	10.4443	7.55435	13.0559	13.0573	12.4284	12.1149	10.7569	11.9892
217845_x_at	10.0367	8.96413	8.29426	9.55683	9.63409	9.73085	8.49177	9.64876	9.96823	10.1718	8.95872	9.05775	7.29171	8.65777	9.81613	8.98632	9.50458	9.99165	8.6322	9.37531	8.92341	9.52508	9.79146	10.2666	9.52	9.60031	9.19931	9.31354	9.58534	8.97226	8.7085	9.88319	8.93489	9.14033	9.42808	9.68065	8.65517	9.60696	8.4888	8.48429	9.11243	10.381	12.5614	12.1682	12.5293	13.3631	12.3281	11.7399	12.4838
209719_x_at	10.7765	7.19929	5.94341	7.36009	5.51854	10.4722	5.43695	5.01518	5.04005	12.2757	11.9329	11.8798	12.2549	10.9877	10.9131	8.82273	12.2376	12.1164	8.61747	12.2435	10.8416	12.2911	11.7375	12.2253	12.7204	12.5527	11.2807	11.9322	12.4524	12.5031	9.43509	7.63005	4.92129	6.07633	5.56973	12.6395	11.5709	12.2289	8.79203	11.6464	10.8337	12.991	8.95099	14.5661	13.6122	14.3817	12.2539	12.1807	12.9574
213068_at	3.56864	3.52325	3.96074	3.40602	3.3915	3.74266	3.5758	3.51218	3.65228	4.12285	4.95386	4.1636	3.73657	3.70437	6.09452	3.62111	4.16934	3.72352	4.33469	5.28398	3.77576	4.0154	3.68756	4.00559	3.59211	4.30092	3.73405	4.25328	4.03455	4.7669	3.95678	3.84398	6.95261	5.31174	3.66806	4.79271	4.12027	4.89106	3.80341	4.29132	4.27136	4.21878	6.05905	7.05932	9.01142	6.51028	7.37217	6.93214	9.04903
221896_s_at	9.46671	8.56559	8.24361	8.95627	9.08134	9.17606	8.08066	9.19348	9.60308	9.64593	8.40569	8.80241	7.04761	7.95919	9.20901	8.38334	8.95249	9.71283	7.86346	8.66017	8.44966	8.95165	9.19829	9.69081	9.05652	9.00626	8.43432	8.51684	8.92939	8.69547	7.81607	9.11283	8.29983	8.32777	8.88537	9.06246	8.26168	8.82447	7.7899	8.08566	8.61645	9.77534	10.9931	10.7714	10.828	11.8193	10.7504	10.3336	11.1204
203575_at	7.937	8.17476	7.40609	8.44127	8.23576	7.75624	7.2344	7.8683	6.83006	6.60942	7.35687	6.96573	7.04806	6.89192	6.96897	7.24606	7.28865	7.1832	7.32993	7.24653	7.66808	7.87111	7.22441	7.14197	6.75521	7.17088	7.00989	7.41865	7.1338	7.03174	6.97466	6.85528	7.92066	6.99821	6.3751	7.08829	6.90281	7.12249	7.16776	6.8721	6.89748	7.44257	8.09565	8.95311	8.7373	8.2634	8.76701	8.98414	9.09621
210413_x_at	10.2764	6.9338	6.58246	6.81947	5.39181	10.1578	6.01103	5.854	5.411	12.1772	11.329	11.4251	11.687	9.58479	10.375	9.13204	11.4148	11.5266	7.88791	11.8813	10.3899	11.1308	10.6959	11.9223	12.0179	12.1396	11.1244	11.2299	11.7632	12.0865	8.80005	7.46904	5.43128	5.9641	5.82782	12.3378	11.0266	11.7792	8.72411	10.9756	10.1593	12.925	8.23345	14.4696	12.8721	13.7653	11.5138	11.6953	11.9514
211906_s_at	9.21623	5.08347	3.71532	3.40049	3.27913	9.46397	3.28411	3.06622	3.18047	11.7016	10.4141	10.8796	10.5722	6.83399	9.54824	7.99474	9.63007	11.0554	4.63823	11.3692	9.62337	9.66059	9.35067	11.8201	10.6564	11.9543	10.3042	9.72571	10.4948	10.7737	6.84608	5.82039	3.38116	3.33839	3.48255	11.8463	9.71477	10.9824	7.19835	9.55602	7.39831	12.0151	6.78414	14.2153	12.2673	13.555	10.9562	10.9523	10.4889
211023_at	9.46309	8.66825	7.4886	9.1663	9.23824	9.04325	8.592	9.13334	10.0373	9.2745	8.7669	8.89396	8.02318	9.03565	9.38082	9.09791	8.61813	9.12476	8.32594	8.80316	8.6126	8.73743	9.01196	9.06367	8.79708	9.13151	8.01307	8.33756	8.78183	8.95213	8.14605	8.70593	8.49795	9.01236	9.28082	8.55551	8.52705	8.79205	7.53856	8.48869	8.08499	8.43123	12.5325	11.6146	11.7529	12.5972	11.9704	11.9349	12.242
218845_at	7.61301	8.24549	7.71376	8.06348	7.10445	6.88724	7.84251	7.4249	6.67579	8.25515	8.214	7.79713	8.46685	7.84475	8.18919	7.74615	8.3138	7.87795	7.83075	8.44853	8.38147	7.4228	8.2005	9.08188	7.60003	8.11486	8.70016	7.99808	7.83834	8.13067	7.82614	7.45228	6.85792	7.40526	7.92259	8.43717	7.15001	7.80948	8.52061	7.13065	8.2944	7.57919	11.8419	12.6297	12.3573	11.0946	11.9617	12.1606	11.8288
201097_s_at	10.4976	10.0837	7.63831	9.76206	9.90477	10.3583	8.25465	9.6767	10.1513	10.8175	9.90636	9.06145	8.24793	9.13171	10.1525	9.58286	9.27106	9.69379	9.42297	9.6544	9.31831	9.27661	9.48856	9.49714	9.94321	9.91697	8.59058	9.14354	10.0923	9.24624	8.78872	10.4576	9.71139	10.4075	10.0685	9.92602	9.21539	10.0108	8.64588	9.24839	9.48646	9.79299	13.9681	12.5641	12.0621	12.877	12.475	12.4463	13.2017
218283_at	8.28669	7.97201	8.16314	7.68459	8.1905	8.22053	7.61339	8.05145	8.73217	8.02943	7.9629	7.53269	6.90312	7.49315	8.23802	7.82902	7.83876	8.23755	7.46994	7.7996	8.1111	7.78981	7.81466	7.82779	8.10142	8.21787	7.48091	7.89397	7.86374	7.50988	7.82716	8.13338	7.36258	7.41482	8.01991	8.11083	8.27293	7.87678	7.37483	8.16645	7.82807	8.41897	10.6038	10.0314	10.072	11.2251	10.9602	10.4346	11.1675
208606_s_at	4.64725	5.23055	5.4448	5.35429	4.20247	4.42542	5.47033	6.1974	4.76529	4.67838	5.4215	5.32844	4.86127	5.35857	5.07022	4.41858	5.94658	4.30288	4.63947	4.87905	6.86368	5.13749	4.55059	6.1881	7.10314	6.58126	5.77099	5.10582	5.87967	6.43586	5.08367	4.45847	4.50244	6.69706	4.62885	6.14534	6.55954	6.426	5.24489	6.88059	6.32081	5.72357	5.68885	8.25412	8.15775	6.09633	9.37633	9.46648	7.45416
203282_at	8.25652	8.52881	9.06627	7.43839	8.72033	9.67052	7.43929	7.07815	8.989	8.74143	8.06824	7.32512	6.46653	7.28713	8.39909	8.74914	7.23646	7.72175	7.96735	8.10224	7.31437	7.36247	7.71432	7.77661	7.93531	8.84926	7.67082	7.00328	7.4695	7.27033	7.26367	7.70702	7.51411	7.3601	8.97151	8.00188	6.73658	7.50073	6.78767	6.56355	7.06352	6.83075	12.15	10.149	10.2315	11.0988	10.5699	11.522	10.834
202209_at	9.36611	9.16602	8.1328	8.87039	9.19237	9.52312	8.08572	9.54539	10.4612	9.8237	9.14834	9.33415	7.87887	9.13048	9.78663	9.41185	9.41315	10.0463	9.31531	9.03667	8.77234	9.24523	8.76998	9.27066	9.10085	9.67913	8.77348	8.76971	8.8221	8.68864	7.97979	9.3781	8.67325	8.80372	9.57836	9.54741	8.96871	8.93423	8.66559	8.72	8.48512	9.09734	10.7269	10.1532	10.0208	10.7381	10.9119	10.2274	10.8248
222209_s_at	7.25629	6.79598	3.97178	7.17926	6.67478	5.32684	6.06653	6.78281	7.72903	6.59516	5.14696	5.51673	4.8956	7.62001	7.11242	4.76606	5.94747	6.16209	5.94429	5.86852	5.08597	6.2193	8.27392	6.70148	5.66427	5.25117	4.41773	4.65976	5.27656	4.68672	4.8141	5.14979	6.5175	4.85923	5.55627	4.8533	5.37681	5.06162	5.00016	5.25553	5.04076	4.86229	9.84286	8.11201	7.45692	8.36018	7.142	8.27699	9.6898
215401_at	5.69449	5.69681	6.50018	6.08904	5.62083	5.87535	7.0879	6.61185	5.34493	5.83609	5.49762	5.8403	6.30601	5.46496	5.23628	5.30658	6.20896	6.07486	5.53235	5.76579	6.59631	5.4367	5.23647	5.75892	5.2106	6.05972	6.48576	5.93405	5.83737	6.30631	6.00295	4.54222	5.54826	5.49211	5.5776	4.24873	5.05779	4.96241	5.61795	5.10404	6.00758	5.70927	6.49892	7.12401	7.63069	6.63211	6.72044	6.99385	7.01642
209466_x_at	5.84877	5.78084	7.02603	6.11971	6.25336	6.08117	6.25226	6.07603	6.10093	6.18878	8.26451	8.7154	7.07209	10.908	6.09395	9.80066	6.99253	7.93869	6.2425	9.9075	6.71297	6.61872	6.16726	6.69166	8.22548	9.00146	6.83072	8.46524	6.61985	6.82177	8.49439	6.46836	10.452	7.51023	6.7425	8.41345	6.81179	6.77232	6.06222	6.67743	6.48328	6.88816	8.71649	8.89006	10.265	8.6886	9.29995	8.55844	11.9698
211737_x_at	3.90285	3.86637	4.56318	3.94459	3.66569	4.11796	3.79592	3.8134	4.14665	4.35594	6.76529	7.61821	5.20904	10.2417	4.50797	8.92843	5.28386	7.11799	4.1744	9.33952	4.63941	4.93666	4.11225	4.7505	7.36701	8.04913	4.32549	8.09955	4.41084	4.2446	7.24039	4.54114	10.2028	5.6827	4.44262	7.26923	4.6417	4.64789	4.02736	4.23767	4.48038	4.23907	6.96818	8.28009	10.0982	6.97409	7.86442	7.19114	11.9616
212797_at	4.42881	3.01994	4.0376	3.2325	3.03298	3.61858	2.93365	3.02827	3.36939	3.14522	2.90469	2.71025	3.36855	2.82057	3.27318	2.83034	3.10629	3.06263	2.89062	2.99345	3.25481	2.90741	3.01331	3.23375	2.97197	2.82683	3.19353	2.75723	2.59688	2.91977	2.8619	3.18624	3.27881	2.89215	3.27004	3.1783	2.97983	3.06121	3.25592	2.98931	3.10689	3.44012	4.73442	4.91852	4.75747	4.99491	5.30151	5.20152	4.04817
202917_s_at	11.8684	6.72641	4.00346	12.3175	3.80969	3.80205	4.40761	8.61811	3.98718	12.8305	12.4652	13.648	14.041	13.8067	13.6791	13.6755	12.3313	13.7842	12.8487	13.693	12.1398	12.3203	8.99672	13.769	13.4226	13.8572	13.6074	12.8807	12.7863	13.873	12.3575	11.4251	5.64703	10.509	8.11164	13.8449	13.1652	13.7105	13.1719	12.9461	13.036	13.8085	13.9738	15.136	15.1737	14.9978	14.3363	14.6753	13.6846
216108_at	3.5955	3.55753	4.23462	3.78738	3.98197	3.63557	3.71365	3.67321	3.56037	3.64413	3.64223	3.7247	3.9871	3.67113	3.61481	3.36594	3.96591	4.21042	3.77818	3.72239	3.80974	3.44997	3.59299	3.86582	3.6643	3.77404	3.74331	3.71503	3.74923	3.64822	4.07284	3.63641	3.9602	3.43247	4.00962	3.67091	3.85489	3.72334	3.82203	4.03941	3.75533	3.73372	5.95971	5.5588	5.4678	6.11937	5.51565	5.6896	5.47719
203733_at	7.71597	7.54402	8.35972	7.56328	8.22228	7.53346	7.72238	7.98258	7.86575	7.41551	7.32275	6.9573	6.94909	6.67546	7.2078	7.17032	7.30373	6.83421	7.07462	7.39026	7.35461	7.36331	7.02637	6.98059	7.34774	7.37803	6.90731	7.002	7.24733	7.27213	7.29166	7.25888	8.21247	7.92588	7.45142	7.33091	7.69483	6.90558	6.86394	7.35914	7.56324	7.70587	7.84237	8.48339	9.04672	7.45663	8.81379	9.35862	8.28974
209665_at	7.66851	7.36958	7.43944	7.63668	7.50535	7.86621	7.47804	7.48202	8.22508	8.26512	7.49211	7.29747	6.75261	7.28993	7.73386	7.36852	7.38318	7.77382	7.10824	7.24927	7.56054	7.08598	7.74893	7.92622	7.28203	7.66181	7.717	7.61273	7.68989	7.94357	7.50613	8.17397	7.54396	8.10129	8.03117	7.35044	8.13515	7.52457	7.7036	8.27342	8.32257	7.91625	8.80982	9.16734	9.15549	8.99315	9.27508	9.19666	9.0243
213642_at	6.5192	7.1905	7.46236	6.52595	6.5091	6.29843	6.59703	6.77699	6.22869	6.55866	6.52763	6.40568	7.25182	6.63038	6.3104	6.73939	6.46563	6.83886	6.76615	5.94775	6.98305	5.91493	5.95052	7.37797	6.50794	6.92163	7.02101	6.94879	6.87133	7.72953	7.21419	6.40879	8.19915	7.38117	6.64667	6.30227	7.12171	7.48557	7.34723	7.08493	7.51776	7.69812	9.63371	11.0975	11.0827	10.0363	10.1153	10.0167	10.6533
209351_at	10.2679	12.1899	5.20613	5.62749	3.62048	4.2375	4.06359	11.9848	4.32965	7.35207	4.35725	13.1341	11.1498	9.4335	7.66165	11.36	12.1642	12.8886	13.4371	12.6023	13.2091	10.9091	3.84195	11.4	11.8583	10.562	13.4157	10.4366	9.53793	13.2994	10.3035	6.66864	3.84526	4.57002	3.6876	12.2864	11.2127	13.4139	13.4845	11.1476	12.5581	12.7903	10.3483	11.9943	14.5852	14.6516	12.3495	14.9032	11.5343
201607_at	6.94378	7.23261	7.54781	7.24823	6.78215	6.94993	7.01217	6.57139	7.39404	7.11255	6.75117	7.20989	6.96419	7.00447	6.71441	6.92433	7.21945	7.06367	6.9471	6.50782	6.76235	6.78963	7.11242	6.40689	6.96079	7.08649	6.61356	6.52834	6.78667	6.75795	6.56115	7.09578	7.57803	6.71535	7.16487	7.03326	6.58079	6.82705	7.19137	6.68317	6.7087	6.88049	9.12828	8.20773	8.33297	9.0053	9.07504	9.46653	9.14339
212309_at	6.64392	6.20176	6.1662	6.3681	6.56024	6.81438	5.97555	5.83101	6.85265	7.19687	6.19593	5.42386	5.46995	6.10986	6.58249	6.04102	5.90517	5.9012	5.91757	6.47655	6.58081	6.24233	7.27015	6.37644	6.06611	6.32704	6.42977	6.00115	6.23927	5.57998	6.31314	6.23793	6.72606	6.78625	6.73492	6.09352	5.95092	5.50795	5.53447	5.61538	5.74523	5.74726	9.13966	7.94019	9.07262	9.5498	8.16994	8.91632	10.1533
217850_at	8.98181	7.92504	8.70593	8.62733	7.63804	8.75156	7.95972	7.71958	9.42103	9.07265	7.76288	7.3227	7.24894	7.46094	8.3337	7.77659	7.27512	8.72456	7.94366	8.06786	9.26772	7.94526	8.07465	9.03877	8.28484	8.42244	7.9549	8.03615	8.20169	7.86754	8.16335	7.55609	7.97601	7.97016	8.38425	7.81055	7.57921	7.38809	6.93219	7.11729	8.03802	8.36629	11.408	10.0883	10.3726	10.5237	9.7299	10.5715	11.3625
204027_s_at	7.03098	7.20129	7.30237	7.74136	7.33803	7.10309	7.96746	7.36967	7.1989	7.10819	7.10868	7.163	7.63247	7.18438	7.0116	7.29421	7.58615	7.26313	7.30456	7.10179	7.73394	7.25775	7.29797	7.46032	6.95269	7.02426	7.5919	7.48886	7.58088	7.05968	7.74595	6.83877	7.51654	7.43944	7.29988	6.79355	7.09765	7.12712	6.87574	6.85493	8.07334	7.04042	8.668	8.63227	9.00196	8.3169	9.05739	9.36842	8.89383
215273_s_at	7.16525	7.3523	7.84403	7.59346	7.30205	7.95967	7.11575	7.32416	7.97128	7.2644	7.51962	7.04717	6.48182	7.24185	7.80037	7.27946	7.01894	7.19415	6.94505	6.9463	7.34128	7.42967	7.19991	7.08188	7.41729	7.37234	7.54666	7.11333	6.96133	6.63055	6.86197	7.55949	7.57742	7.19136	7.06568	7.58654	7.26686	7.36494	7.24282	7.50703	7.71748	7.36907	8.48184	8.22918	8.41666	8.28168	8.46631	9.11045	8.49172
202648_at	6.34299	6.18218	6.98272	6.16657	6.12494	6.04565	6.25816	5.93256	6.22329	6.49074	6.10808	5.854	6.50148	6.03126	5.90651	5.99954	6.28516	6.67053	6.38554	5.8801	6.88163	5.90796	5.94807	6.58198	6.50405	6.304	7.07359	6.51065	6.26919	6.87582	6.94086	5.93723	6.63626	6.31783	5.80995	6.00109	7.05303	6.45301	6.7884	6.87437	6.71134	6.96973	8.29601	9.09655	9.26724	8.22759	8.58734	8.84269	9.1474
207046_at	4.8862	4.8129	5.6638	5.43872	5.67355	5.02315	4.94612	5.0441	5.50632	5.17281	4.6602	4.51922	4.77464	4.95836	4.14664	4.72368	4.98098	4.31528	4.5241	4.55355	5.11697	4.46642	4.5895	4.78666	4.83122	4.64284	5.36985	4.75428	4.79833	4.78935	4.63112	4.83074	4.77265	4.49525	4.8288	5.60982	5.60007	4.72242	5.27068	5.30591	4.72605	4.97469	5.9136	7.00532	6.79426	6.36112	6.66051	7.30739	6.019
214117_s_at	5.92128	5.27483	5.27072	5.07566	5.17995	6.02621	5.41781	4.85952	6.4592	5.50131	5.16886	5.23802	5.01538	4.91998	5.12054	5.38918	4.62797	5.35433	4.86807	4.75002	4.71933	4.75753	4.90336	5.73186	5.18426	5.62118	5.01721	4.46302	4.97144	5.58903	5.07526	6.10023	5.14225	5.36292	5.71007	5.44525	5.51274	5.55702	4.93013	5.13092	4.86148	5.28999	7.22824	7.25111	7.2937	7.54439	7.20905	7.46965	6.91642
221606_s_at	3.75077	3.26666	4.42992	3.26472	3.10708	3.33441	3.27686	3.0395	6.49043	3.83673	2.94099	3.12178	4.31939	3.19428	5.51189	4.71055	3.16834	3.99024	3.10103	3.92011	3.10613	3.20655	4.77271	3.18589	3.34507	3.99898	3.40645	3.06007	3.51073	3.3421	3.6859	4.85047	5.48094	3.37895	5.34788	5.99665	3.30012	3.46865	3.1371	3.2724	3.25043	4.29693	7.43922	6.09888	7.01683	9.84233	8.92586	7.59862	9.02658
218115_at	8.69338	8.48314	8.14089	7.65169	8.76222	9.2058	7.56109	9.48014	8.67467	7.21917	7.8832	8.42683	7.68171	8.75645	8.60726	8.29788	7.93113	7.81632	7.70548	7.86936	7.87647	8.42469	8.18602	7.78854	7.69814	9.11386	7.74443	8.30293	7.47138	7.26411	7.2908	8.90935	7.08661	6.17559	8.94194	8.15846	7.71434	8.07592	8.3531	7.71317	7.96645	8.5711	9.47808	9.77779	8.87258	10.128	9.51977	10.3637	9.17504
220298_s_at	3.32778	3.10067	4.71236	3.39077	3.57209	3.69461	3.13253	3.33747	3.46558	3.33899	3.37921	3.05014	3.28772	3.07797	3.60388	3.07234	3.36594	3.13309	3.26894	3.55263	3.45612	3.19953	3.39209	3.25598	2.98872	3.7583	3.47273	3.19537	3.2164	3.49679	3.93878	4.17126	3.70712	3.52829	4.15764	3.38138	3.61627	3.30328	3.46252	3.72425	3.27319	3.3591	6.05343	5.71322	5.85855	5.93297	6.16325	5.59602	5.62412
203440_at	4.75505	7.04789	5.12926	5.01075	4.78506	6.89501	5.32226	4.6636	7.54355	5.42337	4.97105	4.78236	5.05206	4.83174	5.06612	4.73318	5.30125	4.85068	5.21292	4.94602	5.09575	5.69274	6.29119	4.8802	5.16731	4.93964	5.02025	4.6601	5.13151	5.0422	6.56077	5.34652	8.8711	6.61475	5.54167	4.93086	4.91736	4.90214	4.9986	4.79525	6.06746	4.98775	6.13256	7.10687	7.53893	6.09233	7.28647	6.7025	9.10826
204016_at	7.28016	6.6812	7.36077	7.33936	7.2201	7.09298	6.49906	6.65162	7.97679	7.03301	6.37534	6.46718	6.57384	6.11726	6.53147	6.59452	6.47309	6.92392	6.11205	6.41197	7.24229	6.28126	6.58361	6.49443	6.56024	6.82317	7.08315	6.41056	6.75778	6.44725	6.81498	6.69971	7.12979	6.72945	6.75288	6.45128	7.0695	6.61782	6.68978	6.9566	6.93479	7.02025	7.52272	7.56188	7.93329	7.65995	7.66375	7.92554	7.57081
200908_s_at	5.8336	6.15996	6.53275	5.83339	5.62122	5.97178	5.71579	6.01214	6.05405	6.39439	6.06493	6.05372	5.87119	5.70449	5.89677	6.08915	6.06284	6.48921	6.10848	6.46078	7.02066	5.84182	5.62831	6.49212	6.50381	6.6355	6.55763	6.66704	6.75959	6.89595	7.03506	5.62814	6.48107	6.82899	5.67618	5.78106	6.5169	6.45113	6.76642	6.41849	7.23834	7.10208	7.89257	9.17571	9.59031	7.82178	8.85599	8.76358	9.27122
204167_at	7.29564	6.90689	6.61359	6.57062	6.70017	7.17846	7.11926	6.5076	7.25803	7.37674	6.51639	6.56542	6.49746	6.47101	7.12994	6.45429	6.95914	6.56506	6.66394	6.49314	6.80849	6.28589	6.6955	6.7839	6.65269	6.79572	6.76575	6.47693	6.63197	6.70929	6.76913	7.50821	7.08596	7.26955	7.01585	6.90615	6.97765	6.92703	7.08191	7.17622	6.92952	7.06178	8.8769	8.39031	8.67353	8.75173	8.97495	9.19699	8.95707
201098_at	9.22988	8.80097	7.48886	9.07486	9.78453	9.25481	8.08386	9.68507	9.49906	9.3223	9.33162	9.31625	8.30195	9.75163	8.9316	9.27517	9.88527	9.64027	9.39933	9.343	7.88614	9.03177	8.99443	8.7887	8.8726	9.67342	8.28273	8.91517	8.46369	8.99005	8.20168	9.65131	8.20837	8.49602	9.12429	10.0507	8.17237	9.40451	8.37155	8.28065	8.49308	8.59156	11.8214	10.7911	10.2967	11.6541	11.8898	11.5865	11.1337
201284_s_at	8.19643	7.61008	7.01228	7.66644	7.4244	7.66297	6.45436	8.19715	8.02688	7.61756	6.78147	6.94245	5.87468	6.49654	7.33281	6.95628	6.32787	6.5451	6.29252	5.97705	7.12678	6.70948	6.9484	7.60202	6.99161	7.13749	6.99376	6.7943	7.0969	7.28839	6.78712	7.00431	6.61472	6.98364	6.47222	6.74349	7.34326	6.82179	7.10574	7.3956	7.37277	7.18723	9.0825	9.4072	9.36192	9.72639	9.83022	10.4385	9.49193
202025_x_at	7.72964	7.65411	8.65811	7.75582	8.13429	7.77442	8.10005	7.74233	7.89103	8.19605	7.66701	7.43953	7.86942	7.51505	8.10221	7.2391	7.88946	8.22542	7.20408	7.61781	8.09638	7.69401	8.07653	8.21262	8.29034	8.0207	8.12018	7.83487	8.27654	8.12045	7.70387	8.30661	7.69129	7.99339	7.53376	7.61528	8.16805	7.9243	7.77206	8.02939	8.30161	8.51673	8.59324	9.26841	9.70624	8.96028	8.78241	8.89303	9.36654
216609_at	6.009	6.2926	5.65167	5.4981	5.47482	5.69589	5.32753	5.95704	7.01704	6.85635	6.22379	5.96156	5.61064	6.95446	6.45526	7.10318	6.42909	6.75573	6.85514	6.33438	6.29991	6.06809	5.4252	6.3768	5.77429	6.32741	5.66067	6.68834	5.94206	6.89283	5.61759	6.38632	4.18743	5.28748	4.80039	6.54836	6.80554	6.72805	7.32421	6.31279	6.70239	7.03814	8.73056	11.0653	10.45	9.32612	10.6055	9.98569	10.3611
38892_at	5.74286	5.58108	5.5453	5.94312	5.72296	6.03782	6.41377	5.29624	5.45517	5.91887	6.12476	6.05665	6.50379	6.1287	6.63032	6.31729	6.0299	6.06957	5.59842	7.0013	6.35737	6.00283	6.56827	6.30344	4.8791	5.81758	5.716	6.72694	5.71726	5.51655	6.30001	5.66957	5.91386	5.59643	7.05573	5.28783	5.10143	5.2106	6.94632	5.01441	5.74031	5.52522	9.56819	9.10292	9.34068	8.7473	8.64092	9.18405	10.0325
206276_at	7.31587	4.95505	5.43703	5.18717	5.30506	5.00782	6.978	8.7804	5.0526	7.30384	7.80304	11.5196	10.1708	9.40517	10.2712	9.12474	11.708	10.4535	8.24715	9.7362	10.1126	11.4848	4.92101	5.29057	11.6062	10.5431	11.6691	10.5588	10.772	11.0581	10.0423	5.20254	5.7525	5.60532	4.84854	10.536	11.4975	11.446	11.1103	11.4347	6.90739	9.98421	7.9828	14.0278	13.9353	11.2581	10.4672	14.2505	9.25886
219389_at	5.906	6.3929	5.90145	5.94262	6.06284	5.91832	6.00111	6.35689	6.0989	5.92804	7.90003	8.14277	9.70838	8.47715	8.44297	8.33276	8.04234	6.86823	6.82678	8.14604	8.01925	6.85265	5.86975	8.85576	9.23518	8.78957	6.43787	9.56194	7.55103	6.77648	9.37819	7.59255	7.7225	7.42409	6.60413	6.99001	7.60076	8.45081	7.0161	7.83592	6.82717	8.84465	9.6269	11.921	11.2379	8.88839	11.4345	9.37517	10.0523
219228_at	9.2755	6.60766	8.67674	8.34382	8.04022	6.45245	9.51561	7.08366	7.30443	7.67399	7.28325	7.20921	6.65251	6.24807	7.48314	7.3004	6.83987	7.39939	6.99444	7.76226	9.19038	6.98587	8.14543	8.80072	6.80266	7.66616	7.81969	8.29558	9.31593	8.20688	7.71679	6.63812	8.20353	9.44652	7.3868	6.94151	8.86511	8.03593	7.5784	8.55108	6.98494	6.81302	10.5105	9.5323	8.96817	9.84072	8.64478	7.36856	9.5247
213994_s_at	3.25059	3.34495	3.2373	3.44069	3.6518	3.28849	3.45152	3.40768	3.08947	4.09396	4.82524	3.08639	4.30399	3.70956	3.53323	3.50556	3.28577	4.84032	3.77644	4.95739	3.52071	3.88905	3.24738	3.63891	4.06658	3.93658	3.65882	4.01871	5.17672	6.03756	4.20755	3.6645	6.33251	4.86179	4.79615	3.57356	3.65824	3.75783	3.38432	3.7106	4.6089	4.00656	5.15857	6.43694	8.60096	6.53333	6.67492	5.55155	9.83072
219073_s_at	7.62316	7.16275	6.80058	4.86167	4.94782	3.99525	5.77611	6.24705	7.20374	7.20532	5.9185	6.20036	4.88339	5.36359	6.24006	6.29399	5.38006	5.47426	6.66794	5.82677	6.80578	7.12177	7.37588	6.93348	6.16658	5.61943	4.67762	5.83663	6.27141	6.01669	4.88847	6.57421	7.24256	6.5038	6.52114	6.02655	4.49177	5.91138	5.02329	4.68904	5.54968	5.40643	10.5801	7.26603	8.27577	9.24441	9.75673	8.65026	10.0614
211814_s_at	5.47089	6.91705	4.10915	5.43747	5.96424	7.64767	5.76304	5.84286	6.34293	5.33426	5.4854	6.11649	5.1641	6.85598	5.91327	6.71551	5.36651	5.15055	5.48856	4.81714	4.04384	6.01773	5.14252	4.97446	6.51192	6.70461	4.77018	4.84521	4.79631	4.55534	4.4332	5.97291	4.1131	4.23698	6.83265	6.56904	4.72111	5.81537	5.70441	4.6947	4.14996	5.47911	7.04026	6.80759	6.57413	7.3101	7.12354	6.93082	6.56458
209465_x_at	3.16821	3.36685	3.96285	3.66816	3.88879	3.44144	4.00312	3.50665	3.5204	3.83336	4.78124	4.63445	4.07948	8.23594	4.02862	7.57413	4.13513	4.82138	3.54184	7.23352	4.08872	4.03792	3.90037	4.14068	4.65268	4.67539	3.66353	5.06988	3.67167	3.56762	4.48248	3.99566	8.85624	5.18622	3.72052	4.66487	3.75011	4.39662	3.93994	3.94794	3.64405	3.6687	6.52218	6.1185	7.34993	5.86494	6.76529	5.48483	10.3374
203536_s_at	8.17868	8.14169	7.85252	8.00901	7.40746	7.95147	7.96728	8.37094	7.99162	7.61434	6.70854	7.47384	7.10377	7.07895	7.06623	7.1038	7.1692	6.93104	7.46568	7.0468	7.53803	7.90849	7.33111	7.59037	7.38589	6.69194	6.8239	7.34224	7.21812	7.42993	7.10449	7.23055	7.19714	6.73381	6.34179	8.054	6.98861	7.47925	7.53817	7.21322	7.50732	6.57988	9.58353	9.76437	9.7644	8.73366	10.0853	9.70147	9.7244
200074_s_at	11.1657	10.5275	11.7277	10.6775	10.0986	10.9597	10.1636	10.8019	11.9582	11.4116	10.8193	10.5128	8.88634	10.1252	10.8044	10.5328	10.0065	10.6936	11.0879	10.5992	11.406	10.5618	11.0246	11.2378	10.0081	10.8659	10.2678	10.4467	10.2756	10.5458	10.1922	9.85961	11.1999	10.5317	10.5798	10.0496	10.5153	10.1262	10.2982	10.5196	10.7088	10.8401	11.9679	12.0432	12.0115	11.9746	12.1215	12.3811	12.7679
202753_at	9.75596	9.28511	8.48388	9.72816	9.5837	9.97467	7.93565	9.81832	10.1644	10.2256	9.40489	9.3455	7.71759	8.90012	9.7159	9.29416	9.27163	10.1063	8.96718	9.57003	9.55342	9.44664	9.16146	9.87234	9.74541	9.69143	9.08148	9.11732	9.396	9.02043	8.6037	9.62309	8.63634	9.01722	9.48247	10.0865	9.13117	9.0035	8.79661	9.39232	9.28266	9.46763	11.2344	11.2767	10.8971	12.0005	10.8642	11.5291	12.1131
219795_at	9.23613	2.90482	4.20427	6.43615	3.61804	3.22992	6.30996	3.17786	3.44289	9.92402	7.4887	6.10945	7.17245	5.68913	7.79482	3.69951	7.18786	6.12311	4.03114	5.91524	3.35232	4.24774	8.89118	3.40833	7.36204	5.62005	4.39726	7.30239	8.51845	7.26768	4.1491	4.09243	3.34035	5.95254	4.97012	5.56111	2.83385	6.99462	6.53305	3.72546	8.12173	6.52886	6.41765	12.113	10.9075	4.7884	8.57373	6.01666	8.95062
213204_at	5.95534	6.61553	7.16242	6.61071	6.50441	6.43328	7.29426	6.09608	5.85785	6.30304	6.78178	7.38215	7.04503	6.47787	6.54442	7.07858	6.6444	6.60608	6.49274	6.63952	7.63336	6.24863	6.34517	7.32501	6.77944	6.74717	7.60359	7.22011	6.63851	6.42262	7.15858	6.53021	6.13909	6.40929	6.33449	6.44126	7.50459	6.41874	7.32473	7.56327	7.22202	7.20697	7.36539	8.26949	8.96696	8.09738	7.59304	8.36775	9.39775
208762_at	2.70947	3.31977	2.74407	2.824	3.14387	3.16243	2.71478	2.91949	3.24958	2.9308	2.78659	2.95643	2.73065	2.77284	2.85919	3.26091	2.62933	2.89352	2.60925	2.84516	2.74092	2.21263	2.82145	2.257	2.55995	2.51369	2.28233	2.61756	2.66447	2.42805	2.751	2.579	2.81066	2.52673	2.7593	2.99268	2.85099	2.69813	2.63994	2.62079	2.50712	2.75418	7.80185	7.71648	6.32737	8.11334	7.99882	6.75423	8.44234
212969_x_at	6.79319	7.9414	7.83396	6.91341	7.00802	7.29702	7.14003	7.1519	6.95916	6.58872	6.97258	7.14818	7.09439	6.71499	7.04155	6.91822	7.73043	7.0352	6.93	6.66228	8.05063	7.2237	6.44008	7.82043	7.98633	7.25173	7.56764	7.2458	7.54729	7.39926	7.12569	6.55472	7.20539	6.91433	6.42472	6.80756	7.52912	7.09319	7.62584	7.39428	7.48771	7.58301	8.00477	8.62943	8.85538	7.3965	8.16849	8.08277	7.74225
204382_at	7.51445	8.11526	8.61771	7.71025	7.586	7.4074	8.39095	7.29623	7.28368	7.52206	7.65559	7.47249	8.09766	7.72348	7.06215	7.45858	7.12711	7.35494	7.71483	7.5215	7.91963	7.54152	7.61462	8.21078	7.39302	7.7129	7.79634	7.46369	7.97116	7.55015	7.91101	7.32151	8.78548	7.77045	7.59586	7.63369	7.94123	7.63877	7.47131	8.25183	8.72871	7.26157	8.58163	8.89281	9.5395	8.61195	8.82443	9.27946	9.34823
220994_s_at	3.79183	3.90794	4.47588	5.28038	3.54499	3.77771	3.67817	4.8288	3.9059	3.51806	4.04762	4.26966	3.67417	3.66132	3.80148	4.85931	3.48241	3.98855	3.58458	3.62941	3.5996	3.57525	3.4094	3.91105	3.51997	4.11984	3.93758	4.3076	3.90035	4.77157	4.63013	5.18536	5.42242	3.72202	3.5991	4.12529	4.39273	3.7783	3.84195	3.99189	4.07829	4.46355	5.98576	6.64627	6.85052	6.7281	7.01758	9.04071	7.2915
213164_at	8.5014	7.13773	6.18356	7.5488	9.46851	9.11923	9.86108	7.41589	8.11205	9.44764	9.47507	8.4429	9.35857	8.96504	8.7547	8.21327	8.22791	9.51455	9.45588	9.68852	9.14996	9.58626	9.50248	8.71044	9.51077	8.57561	8.73925	9.58218	9.67371	9.13311	8.60868	8.24076	9.29884	8.14379	7.85741	9.45139	8.12737	7.97111	8.7782	8.02112	7.43702	9.09725	13.372	11.9372	10.9965	12.0691	10.3809	11.417	13.0511
205730_s_at	7.50337	6.93823	6.10518	5.27158	5.2314	5.10199	6.12713	5.51901	6.2399	5.69198	6.01572	5.538	5.97122	7.50792	5.88984	6.15885	7.16935	6.0624	6.74903	5.57581	6.8432	7.30873	6.93142	7.03716	7.85669	7.25242	6.30036	6.94225	6.57863	6.77462	6.15937	5.81386	5.94237	6.7039	5.54001	6.46627	6.14789	6.22989	6.25475	6.02344	7.14801	6.98991	7.87441	8.41005	8.862	7.96165	8.98113	7.43599	9.22758
200761_s_at	9.69231	8.6842	7.36227	8.22425	9.20638	8.34823	8.65093	8.92496	9.96711	10.1056	9.54589	9.18872	7.48567	8.85319	10.3836	8.23734	8.78946	9.49566	8.40886	9.893	8.31093	8.42803	9.61263	8.80164	9.29232	9.0621	8.38774	9.36967	9.33514	8.4701	9.45704	10.1662	9.49896	9.06534	8.74928	9.2813	9.20132	8.77614	8.31158	8.93972	9.29536	8.52647	13.0278	11.6431	12.3496	12.5704	11.971	11.0296	13.0052
209694_at	9.21614	8.36502	8.00397	9.50046	9.82418	9.64424	8.41235	9.22057	9.49074	9.4915	8.5001	8.49014	8.17355	8.10205	8.85687	8.63932	9.1001	7.73363	8.40459	8.70325	8.19112	9.25107	8.08093	8.16494	9.11752	8.57739	7.44585	8.37654	8.1827	9.24947	7.55516	8.33663	7.6224	8.07816	9.38844	8.13399	7.94235	8.23796	8.76277	7.82957	7.37277	8.30452	11.7086	11.8427	10.9367	11.0045	11.4986	10.9216	10.9719
219476_at	8.34139	7.4592	6.11041	7.02579	4.76642	4.5796	6.33083	7.97323	4.99216	7.36593	5.36108	5.60303	7.40285	6.77872	6.49441	5.1621	7.98814	6.56729	7.20234	7.19568	8.42169	7.24534	7.13884	8.42267	7.64715	6.73927	6.2937	9.04325	7.3776	7.28774	6.46827	7.28634	5.39164	6.15134	6.53022	6.21104	6.87596	5.79353	7.31589	6.89664	7.27117	8.79774	7.83507	10.0611	10.9598	8.92584	10.008	10.7	9.11517
212488_at	5.16405	8.75574	6.86806	6.95041	8.66111	9.11814	7.70593	6.38146	10.3901	9.51299	8.58581	7.48668	6.24191	6.28434	9.59194	7.28898	8.43687	7.69269	9.35208	8.74618	7.57483	9.26726	7.54791	7.1003	8.84726	8.29075	6.36125	7.87978	10.2438	9.38884	7.93505	8.16504	8.62178	10.7455	8.87978	7.82512	7.0899	9.39324	7.86018	7.07195	8.53706	7.15432	10.5919	9.68272	10.8379	8.48421	10.1686	9.78931	11.4816
201619_at	10.3742	9.41419	8.92513	9.53233	10.4555	10.4103	8.13748	9.81261	10.4824	9.79136	9.54675	9.77233	8.49296	9.80641	9.76897	9.11944	9.28557	8.85649	8.8958	9.73925	8.45941	10.2875	10.4469	8.37779	9.46147	9.19471	8.88119	9.30763	9.05484	8.9768	7.66134	8.9512	9.49383	9.01952	9.70605	9.21326	8.62408	9.23624	8.82007	8.80478	7.69567	8.54189	11.2546	10.9991	10.4554	11.8233	11.7169	11.5828	12.2001
218078_s_at	6.90193	6.59085	6.54798	6.47222	6.74247	6.82393	6.4973	7.46044	7.69653	7.44894	6.7758	6.63904	6.41787	7.27477	6.96589	6.61138	7.00239	7.09303	6.17587	6.37096	7.05453	7.22806	6.81591	6.87899	7.03966	6.93626	6.51995	6.68948	6.66541	6.56236	6.26907	6.8022	7.00845	6.2761	6.6654	6.96919	7.39464	6.49711	6.77468	7.55252	6.87761	7.38112	8.95119	9.29529	9.5345	9.14324	9.76849	8.79955	9.24414
207996_s_at	2.44735	2.2221	2.38584	2.35722	2.36266	2.38333	2.432	2.1127	3.52112	3.09213	3.82402	2.6252	2.42639	2.70798	3.06554	2.36742	2.4404	3.07212	2.26045	3.53098	2.36653	2.47533	2.79409	2.7343	3.70325	2.69854	2.54039	3.40856	2.58819	2.83537	3.34266	3.35551	4.73204	3.52097	4.63099	3.22378	2.54299	2.52626	2.45415	2.81657	2.72808	2.46158	6.69779	8.97038	8.45167	7.77954	9.35039	6.09653	10.7574
213736_at	6.52122	6.64977	7.14847	6.87431	6.75264	6.60224	7.26253	6.82178	6.72541	6.78299	6.39061	6.86147	7.44867	7.73274	6.66972	6.68832	7.11803	7.49001	6.83431	6.95492	7.32096	6.74102	6.67356	6.81843	6.78938	6.47356	6.89174	7.25043	6.63408	7.41169	7.27695	6.58358	7.01513	6.65118	6.71996	6.91052	7.26417	7.11075	7.2976	7.1556	7.02866	7.06793	8.3188	9.7141	9.57565	8.86198	9.96545	9.52651	9.43529
202035_s_at	3.8287	3.80525	4.40035	3.84652	3.76684	4.01366	4.38465	3.73725	3.64803	4.96142	5.32486	4.18478	5.42116	4.08474	3.75248	3.81968	4.32371	4.36129	3.87652	5.27207	4.07452	3.80496	3.64866	4.13529	3.98139	4.68682	3.94319	4.66407	4.23877	5.25013	4.68838	3.73976	4.78432	5.04177	3.89621	4.14362	4.24181	4.07896	4.10302	4.24766	4.17984	4.25401	4.79257	5.54247	6.73306	5.64681	5.98172	5.61257	5.44162
208832_at	7.02474	6.74253	6.6075	6.68358	7.28799	7.11452	6.64738	7.24626	7.47986	6.48939	7.19542	6.8605	7.46575	6.97004	6.94826	6.92954	7.13091	7.39414	7.02195	6.9766	6.92876	6.98219	6.54522	6.32113	6.98241	7.01701	7.22286	6.75592	7.12189	6.45554	7.03692	7.13152	7.36161	7.07591	7.41053	7.33902	6.97395	6.6839	6.67456	7.06425	7.04518	6.98186	9.21092	9.23469	9.09333	9.36605	9.5759	9.17014	9.47508
209436_at	5.58174	5.79755	6.43371	6.11492	5.95417	5.82188	6.128	5.94125	5.87806	6.30256	8.42121	6.47624	5.9822	5.87946	6.96224	6.40678	6.3857	7.16236	6.74537	7.2292	6.05893	6.92532	6.3393	6.82752	6.50433	7.39807	6.26737	6.6236	8.2541	8.24572	6.46746	6.56969	9.80005	8.62103	7.88211	6.7544	6.75613	7.07951	6.36638	6.82139	6.80479	6.97204	8.5973	8.92574	9.95868	9.28228	9.02851	8.94972	10.1476
204051_s_at	5.15063	5.17235	6.68223	5.34049	5.6583	5.22693	5.18202	5.2564	5.46788	7.82262	11.487	6.21404	5.9632	5.07941	9.11634	5.45021	6.30216	5.90204	6.05586	10.5833	5.83364	6.54228	6.64698	7.88442	7.20337	10.621	5.76605	9.24024	8.23965	8.13477	7.06847	6.29481	6.31373	9.41977	6.30788	6.17855	7.37025	9.1989	5.71917	7.06915	7.87659	7.7492	7.04099	9.62518	9.77764	7.56494	8.44543	6.52239	13.4106
210835_s_at	10.4434	10.0839	9.19743	9.87777	10.2053	9.70691	11.7671	9.43592	9.08996	11.0255	9.89274	9.79561	10.3296	10.0135	9.83534	8.48944	9.8402	9.39383	9.37955	10.4693	11.5822	10.0186	9.84419	10.0004	9.58682	9.43748	10.7106	11.0707	9.65344	10.0206	10.1055	9.67994	10.5752	9.6193	10.1966	8.71509	8.45518	8.73428	9.85666	8.70509	10.5351	9.31239	13.4415	13.1742	12.0016	13.199	11.9214	11.5419	13.261
221549_at	7.67462	7.63048	8.36755	7.9987	7.63551	7.61796	7.61044	7.669	7.55089	7.61362	7.5066	7.5306	8.18539	7.54835	7.48287	7.5613	7.46044	7.98289	7.46505	7.57491	8.16591	7.47471	7.52968	7.81766	8.06186	7.61332	7.99749	7.95339	7.73775	7.18723	7.5949	7.42256	7.46466	7.86862	7.43939	7.54166	7.78431	7.65746	7.90588	7.81434	8.23815	7.683	9.32588	9.89992	9.9352	9.77177	10.2208	10.1006	9.55107
204687_at	6.15438	6.31908	6.76557	6.14225	6.02508	6.20273	7.07167	6.0964	5.97923	6.51353	6.83004	6.38424	6.80417	6.4513	6.4694	6.32374	6.21313	6.42403	6.30607	6.65988	6.52126	7.20838	6.01672	6.3555	7.19088	6.97543	6.80389	6.55371	6.92144	7.03866	7.45184	6.39286	6.63515	7.1136	7.49278	6.78741	7.31893	6.91695	6.62548	7.31771	6.98166	7.15264	9.18464	9.97977	9.85994	9.271	9.1639	9.10795	10.6397
203315_at	7.30598	8.21467	8.25386	7.50757	7.66992	8.03328	8.54816	8.55274	6.68901	8.17701	8.27377	8.60955	8.75439	8.97453	9.03369	8.21635	8.67768	7.75106	8.38797	8.88507	9.07263	9.0542	6.51669	8.64805	9.27523	8.15476	8.4864	8.8022	8.52769	8.84222	8.52544	8.40596	8.10106	8.0128	8.432	7.69311	8.57241	9.44392	8.14424	8.30419	7.43277	8.40083	10.6654	11.3747	10.586	10.4252	10.7592	11.2105	10.8498
208790_s_at	7.13197	8.36426	6.31262	5.97543	6.88845	7.69284	6.6171	8.37118	6.12114	5.69589	5.5584	5.49558	4.84049	5.68568	6.01401	6.06272	6.4233	5.20295	6.53271	5.97919	5.63537	6.16873	5.52811	6.43529	5.65828	5.83991	4.95894	5.38271	6.02861	6.13703	6.6644	4.66601	5.84144	6.39127	5.0517	4.9877	5.43949	6.28205	6.38846	5.564	6.26213	5.74853	6.1352	7.1451	7.75146	6.66597	6.13853	7.17181	6.27534
213611_at	6.03967	5.91923	7.06735	5.7323	5.95703	6.16381	6.03449	6.03396	5.93844	6.18911	6.92043	5.88129	5.62869	5.97957	5.82631	5.82791	6.89908	5.96091	5.9564	5.82394	6.08687	5.7244	6.66671	6.12205	6.72068	6.48707	6.62163	7.5401	6.40681	7.10747	6.51724	5.92931	6.26458	6.59359	6.35782	5.97607	6.28482	6.2933	6.63068	6.79949	6.41665	6.79014	6.46907	6.90793	7.39129	7.23453	7.64819	7.23112	6.76972
209550_at	5.50406	4.75915	6.14468	5.35043	5.45737	5.28786	5.3256	5.0768	5.4881	6.38343	8.29893	5.82845	5.95154	5.67494	7.15272	5.9416	6.23077	6.10671	5.91582	8.22928	5.87812	6.61168	5.98997	6.0297	6.25433	7.33653	5.83645	7.05373	7.05399	7.06084	6.36823	6.32191	8.85425	7.85744	6.6729	6.64655	6.29178	6.41484	5.5558	6.41136	6.89472	6.23306	8.64402	8.77588	10.1161	8.93792	9.18537	11.5541	12.0781
207257_at	4.35692	4.36797	5.51713	4.10606	4.51474	4.20035	4.34175	4.11839	3.92038	4.34505	4.38885	4.39965	4.65236	4.50556	4.26414	4.06793	4.67911	4.35958	4.57745	4.40971	4.90953	4.1258	4.4801	4.75847	4.29179	4.28986	5.1751	4.64606	4.40026	4.69471	4.71892	4.20158	4.06361	3.80154	4.37967	4.20772	4.38691	4.3407	4.42786	4.65571	4.67927	4.44656	5.38672	5.5298	6.59782	5.73145	5.66687	5.7141	6.19883
219133_at	6.93842	6.45683	6.69654	7.65201	7.22178	6.82833	7.16829	7.36019	7.53989	7.27189	6.66314	6.47597	5.54325	7.06116	6.616	6.90258	6.23667	7.12699	6.35256	6.38719	6.49003	6.95007	6.72612	6.91792	6.55252	7.19331	6.34715	6.01667	6.47546	6.52674	6.50559	6.80352	6.47012	6.25052	6.34297	7.03414	6.67846	6.81892	6.25177	6.81658	6.32282	6.73342	10.0931	8.74782	9.80251	8.81234	9.53555	10.4578	9.97046
204672_s_at	3.38961	3.17295	4.55943	3.35082	3.87958	4.73389	3.77439	3.90617	3.65343	3.53032	5.14529	3.63252	3.50017	3.97691	4.05121	4.16592	3.77486	3.90863	3.87521	5.10371	3.6957	4.24862	3.905	4.14857	5.25251	4.76289	4.03109	4.40972	4.28934	3.70588	4.35559	3.44851	4.2454	4.85693	5.09067	3.9917	3.75207	4.44716	3.4447	3.26108	3.87272	4.02443	7.60566	7.09163	7.62001	6.84011	6.26344	5.48589	8.74648
201653_at	9.94066	9.85037	7.0541	9.64466	9.18376	9.0422	8.49149	9.45752	9.69473	9.62047	9.06766	9.62673	7.18534	9.00001	9.32468	10.0973	9.15093	9.19904	10.055	8.79237	8.89698	9.34142	9.16932	8.74799	8.90944	8.6873	7.17745	8.39808	8.67664	8.82927	7.30487	9.03628	8.45009	8.32776	8.7358	9.26712	8.04957	8.28483	8.01655	7.69797	8.46638	7.62125	12.5397	10.9948	9.35419	11.4199	11.7641	11.1209	11.813
213652_at	2.31968	3.03749	2.6317	3.52304	3.27064	2.72414	2.8978	6.7781	2.54229	3.76358	4.64937	4.04865	3.23724	3.35618	3.67154	4.21988	4.95151	3.79613	4.27922	4.32085	3.5517	4.5803	2.82216	3.17406	3.50336	3.92566	3.31608	3.74483	3.91468	5.56693	3.45014	3.25536	4.52839	3.47192	3.59946	3.43128	3.60646	3.8428	3.1391	3.62389	3.47264	3.83163	7.41799	8.14687	8.96557	7.372	10.4023	6.14248	10.9648
201505_at	9.17531	8.67716	4.302	6.49398	7.37457	8.31093	8.09624	8.04518	7.65715	8.40617	6.30647	6.05625	4.61517	5.73172	7.39601	6.71107	5.60113	6.42959	6.75191	7.23378	3.77884	8.51523	7.44653	6.00325	6.49449	6.40218	3.85324	5.71965	7.88958	7.43098	6.40312	7.37193	7.9065	7.59894	6.36692	5.78074	4.89988	6.41287	5.80709	5.03992	7.91543	4.92849	10.4343	7.76425	9.20643	6.95768	8.37241	7.49277	10.6658
205322_s_at	6.49517	6.49408	6.55466	6.48281	6.80571	6.75617	7.30322	6.29973	6.31152	6.89104	6.6743	6.64541	7.32017	6.7828	6.82657	6.88417	6.78784	6.85773	6.76804	6.69875	7.58921	6.57533	6.49672	7.2549	6.98933	7.21292	7.58121	7.02085	6.63408	7.50711	7.27812	6.64778	5.84604	6.09482	6.12534	7.00489	6.88351	7.1392	6.92853	6.92148	6.70568	7.1063	8.73493	9.41285	8.71433	9.27755	8.2767	8.71903	8.05583
203427_at	6.02214	5.76643	4.87433	6.24718	6.01659	5.7445	6.48179	6.52223	7.21459	6.20752	6.84856	6.95403	5.36406	5.85639	6.96216	8.01009	6.26807	6.03973	5.57233	6.73531	5.52164	6.22494	5.87846	4.73049	6.23747	5.867	5.53603	5.9105	5.18805	5.16306	5.07416	6.27098	5.71555	5.09511	6.61551	6.10711	4.91422	5.81051	5.7036	4.86105	4.75922	5.41399	9.67865	9.61423	9.04211	10.073	9.09754	9.69885	10.5969
204523_at	5.51848	5.55935	5.48444	6.37709	5.77319	5.47903	5.88758	5.19612	4.81746	6.18198	5.73609	5.71281	5.53319	5.6923	5.62902	6.24444	5.85717	5.20648	5.52426	5.70992	5.32035	5.54855	6.0166	5.46452	5.93264	5.49251	5.08054	5.56174	5.4984	5.21112	5.66827	5.95286	6.09345	5.12381	5.46965	5.93931	5.603	5.44624	5.66552	5.3276	5.58587	5.5509	8.98044	7.35792	7.67196	8.02675	7.95961	8.82657	9.26719
214880_x_at	6.24029	7.12841	7.32062	6.5068	7.26243	6.87986	7.01467	6.83203	7.59485	6.73086	6.80778	6.87434	6.56882	6.59679	6.83101	6.70331	6.65963	7.22357	6.62957	6.86704	6.83287	7.09786	6.82903	6.63264	6.89802	6.80047	6.25842	6.5165	7.10369	6.82432	6.78387	6.72053	6.78813	7.93099	7.25249	7.61367	6.80279	7.48914	6.8299	6.93835	6.42186	6.7331	8.20711	7.38872	7.14303	7.59284	6.97517	7.3123	7.93285
203658_at	7.61514	7.00416	8.29066	7.1669	7.76453	7.28187	7.1039	7.2884	8.46078	7.3678	7.513	7.38689	7.03359	6.99946	7.87491	6.65645	7.14216	7.19606	7.0747	7.44289	7.01568	7.20636	7.68463	7.45306	7.17973	7.63747	8.03343	7.04008	7.74806	7.23193	7.24458	8.29978	7.99835	7.90265	7.79526	7.72952	8.3153	7.67604	7.49515	8.26325	7.39894	7.87257	9.33727	8.12956	9.08987	8.69271	8.76988	8.54383	8.57196
216267_s_at	6.33932	6.03544	6.75353	6.03855	6.67188	7.20128	6.3331	6.73074	6.51319	6.0693	5.72061	5.4867	5.99223	5.60098	6.1109	5.89029	5.7227	5.72876	5.28227	5.49188	6.41703	5.63703	5.94987	6.4217	5.8135	6.0389	6.33096	5.93053	6.01211	5.98923	6.09667	6.33195	6.41536	6.2189	6.01921	6.0705	6.74362	5.86282	6.10322	6.31729	6.27481	6.25458	7.60235	7.48802	8.4317	7.70839	7.61973	7.9493	7.67047
63009_at	5.77795	5.70131	6.55783	5.54311	6.15335	6.06582	5.74498	5.8192	6.52108	5.96711	5.71887	5.55388	5.35657	5.59693	5.89319	5.68975	5.3854	5.89867	5.46325	5.61519	6.19715	5.33654	5.53583	6.31999	5.79975	5.86707	6.03718	5.75588	5.84378	5.47564	5.81091	5.55108	5.6023	5.76217	5.72503	5.836	5.99576	5.84795	5.5548	5.90709	5.62252	5.68692	10.1589	8.58347	8.68704	9.57237	9.31972	9.55605	9.2367
202766_s_at	4.89811	4.84845	6.53875	5.00931	5.1855	6.47288	8.34811	5.47453	9.99595	8.86787	8.29282	7.91587	5.60405	6.61977	10.0285	7.03924	7.80353	7.81905	8.71468	9.22802	7.07502	8.72983	10.8034	6.82024	8.1551	7.48894	6.22211	8.02767	8.74654	8.95691	7.41261	7.23559	9.91319	10.0965	8.7389	7.55117	6.72924	8.47903	6.8328	6.63689	7.19767	6.66138	9.77419	9.10231	10.9548	9.25967	8.89715	7.85548	12.1917
218829_s_at	6.41214	6.04385	6.02026	7.15729	4.65662	6.12258	6.60936	5.5197	6.17655	6.92085	5.53275	5.73442	4.55594	5.2994	6.6439	4.57853	6.51558	5.88146	6.72909	6.31551	6.14159	6.36634	6.98813	6.50964	6.0263	5.81338	5.34603	5.58172	5.27891	5.96403	4.93015	4.63456	5.81235	6.42188	7.14567	5.03042	5.754	5.17111	5.01071	5.80253	6.15103	6.00233	10.0417	7.48648	7.54601	8.57312	7.79943	9.61153	8.8435
211865_s_at	4.81248	5.25529	5.43482	4.80346	4.62227	5.43543	5.14943	5.05	4.09693	4.32767	4.18874	4.56901	4.67738	5.00105	4.45374	4.71783	4.46172	4.2779	4.79222	3.94204	4.53569	4.75834	3.96466	4.91856	5.03515	4.68105	4.51061	4.70166	4.84759	5.08464	4.59654	4.65978	4.29484	3.90076	4.47678	4.1131	4.78434	4.28175	4.77548	4.88949	4.74322	4.38597	5.33944	6.02189	6.04997	5.37366	5.83873	5.95934	5.58478
34187_at	5.28994	4.65061	5.09068	4.58853	4.83654	4.74238	4.50041	5.30013	4.35013	4.70832	4.29775	4.68721	4.87334	4.80361	4.69122	4.63737	4.68454	4.24859	4.73487	4.32011	5.08418	4.75757	4.74287	4.50269	4.4847	4.44698	4.74058	4.67654	4.76499	4.56103	4.59772	4.55754	4.46585	4.44892	4.39302	4.42516	4.8858	4.43013	4.79316	4.6964	4.79488	4.65697	8.14589	7.09285	7.79937	7.60109	7.80691	7.24836	8.10332
222064_s_at	6.74042	6.76247	7.12751	7.77746	6.47987	6.49298	7.16705	7.33915	7.757	6.61089	6.21266	6.9573	6.47908	6.87645	5.93951	6.66646	6.61144	6.71569	6.34173	6.07028	6.97677	6.85011	6.20634	6.47413	6.28365	6.54293	6.41191	6.68666	6.79331	7.33438	6.31696	6.09576	7.16278	6.60249	6.20734	6.57067	6.16074	6.44317	7.01446	6.30906	7.53057	6.17053	7.80922	8.36721	8.42408	7.76548	8.47833	8.64961	8.76943
206731_at	2.93376	2.98469	3.21369	3.18608	3.09178	3.02734	3.49162	2.88206	2.98054	3.08332	3.21742	3.01814	3.43306	2.97009	3.0354	3.127	3.24076	3.33276	3.18918	2.87072	3.56307	3.05444	3.16735	3.1656	3.10751	3.21321	3.43571	3.07777	3.33537	3.46941	3.5348	3.10251	3.67979	3.22588	3.27085	3.2418	3.29015	3.29129	3.07095	3.28582	3.32827	3.25301	4.872	4.89565	5.23514	5.12464	4.90732	5.02759	4.57989
203535_at	12.1148	8.94163	6.58674	12.4799	5.68414	5.78401	6.59163	5.60015	5.97514	12.4551	10.8676	13.2335	13.4865	13.3736	13.107	12.7765	11.011	13.248	11.2908	12.3785	10.4976	10.7915	9.79597	13.3454	12.4885	13.6384	12.9907	11.4168	11.5434	13.71	10.8178	9.97076	6.05736	9.25506	6.94334	14.1091	12.2452	13.7729	12.4707	12.0681	12.8652	13.9482	11.8199	15.0213	14.5134	14.4611	12.9878	13.7299	10.831
221475_s_at	12.1061	11.4853	12.227	11.8371	11.4417	11.7331	11.4087	11.7599	12.0854	11.6912	11.6202	11.0131	10.0804	11.2431	11.5487	11.4084	11.1469	11.788	11.6125	11.1924	11.6624	11.0854	11.4869	11.7846	10.7972	11.6264	11.1017	11.1499	11.0358	11.4233	11.1779	11.2147	12.2661	11.1322	11.6709	11.3797	11.2328	10.7807	10.9252	11.1496	10.8384	11.3871	13.6549	12.8463	13.9247	13.1907	14.0159	13.7718	14.1602
213056_at	5.64701	4.38353	3.41595	4.85512	2.94662	2.99574	4.69303	5.34168	3.1656	5.59509	5.22363	4.57123	5.11043	5.39199	6.61326	5.26346	5.49286	5.81901	5.08128	5.48353	7.29494	4.76042	5.73062	5.85676	6.09474	5.44979	4.31359	5.4267	5.25645	4.89039	4.32925	6.0317	4.72281	3.97748	3.43052	5.69369	5.13339	4.98063	4.6639	4.60179	4.81751	5.53057	10.0061	10.3905	9.58736	10.6081	8.93532	9.94857	10.2343
201863_at	8.44406	8.64816	8.86119	8.20441	8.62511	8.58015	7.66551	9.24235	8.75491	8.22427	9.10709	8.99088	8.65817	8.99895	8.81247	8.59162	8.83375	8.68633	8.48704	8.59971	8.74249	8.74501	8.60622	8.34963	8.95288	8.54452	8.81091	8.92553	8.4401	8.41169	9.20659	9.42282	8.77627	8.29615	8.32665	9.52493	8.57301	8.76238	8.62353	8.75625	8.55884	8.51292	10.4639	11.1656	11.1135	11.0629	10.6253	11.631	11.1324
209243_s_at	3.20776	3.06747	3.26691	3.00123	3.32464	3.1288	3.28555	3.16366	3.30159	3.47566	3.43663	2.9887	3.25375	3.20222	3.13834	3.11644	3.01955	3.23709	3.07698	3.67822	3.26989	3.03832	3.19399	3.35432	3.23865	3.25755	3.47903	3.13971	3.49946	3.44372	3.79073	3.53729	3.32706	3.24716	3.52429	3.01913	3.16809	3.23907	3.39759	3.20617	3.18111	3.6469	4.81219	4.73745	4.86454	4.86928	4.78337	4.45796	4.89131
220160_s_at	6.88874	7.01601	7.94653	7.38091	7.40799	6.77866	6.28521	6.94195	6.46031	6.84164	6.55719	7.02	7.80951	7.34807	6.65899	7.08239	6.83923	6.71981	6.72182	7.01713	7.08626	6.46292	6.63645	7.20123	7.3453	6.1736	7.16144	6.83439	7.0093	6.65103	6.8768	6.79963	6.82694	6.89391	6.69343	6.84105	6.58549	7.03644	6.71048	6.7446	6.94992	6.45659	9.61516	9.95761	9.83199	9.32063	10.73	10.1186	9.1503
213425_at	3.09815	4.21451	3.54628	3.84484	7.78536	3.7834	3.39557	3.97581	5.57246	5.07266	6.05018	4.82965	4.63227	4.56799	5.39875	7.43457	5.59188	5.32197	3.95495	5.93107	3.22098	5.52429	4.58519	4.03562	5.68289	4.96415	3.31083	4.22587	5.46366	6.55611	4.14091	5.58122	5.61418	4.72242	6.09652	5.33634	3.67795	4.99624	3.44723	3.58948	4.60512	5.88758	10.5027	10.1487	10.1584	10.0621	9.7555	8.64712	10.2534
210549_s_at	2.82294	2.77721	3.35411	2.81228	2.9401	2.83985	3.09614	2.92099	2.9103	3.06064	2.82739	3.02672	3.03762	3.09449	2.82683	2.72607	2.87836	2.84191	2.94228	3.10959	3.09599	2.84146	3.20389	3.17614	2.83309	2.86874	3.23767	2.91778	3.09401	3.63713	3.11581	2.7382	2.83991	2.76457	2.86136	2.89215	3.00482	2.82946	2.96113	3.0647	2.90841	2.82981	4.91939	4.90145	4.99777	5.1184	4.81526	5.16778	6.76878
214291_at	5.72044	6.88145	6.86674	6.44264	6.82993	6.4304	7.70443	6.04424	6.23038	6.88836	6.48234	6.60083	6.90295	6.25184	6.01491	6.64967	6.99054	6.59472	7.29248	7.50624	8.30398	6.85542	7.59445	8.13906	6.81605	6.1782	6.80974	7.01117	7.55489	6.05552	6.82042	6.01023	7.91342	7.52302	7.7419	6.3982	6.89665	6.46802	7.03274	6.94388	7.09783	7.23143	9.51085	8.8334	9.27857	9.14218	8.76777	9.17022	8.64313
213721_at	4.92156	5.15815	11.247	5.15257	5.19787	5.22284	5.35757	5.8918	5.0259	5.21241	8.11176	5.55092	7.47463	8.81324	5.94964	8.9575	6.81316	6.52473	6.06956	6.06956	5.52726	5.77779	5.17512	5.41048	7.11983	7.27808	6.26233	7.80087	5.95191	5.69076	6.1469	4.90759	5.28052	5.60134	7.27714	6.9808	6.54036	6.61554	6.37362	6.74527	5.72976	7.09033	6.53184	9.29416	9.00061	6.345	9.77297	6.93088	7.15388
205326_at	5.23318	5.68901	6.148	5.9133	5.98661	5.64038	5.48481	5.72205	5.75988	6.47219	6.91709	6.44903	6.27312	5.45391	8.06512	6.15825	6.16303	6.57666	6.14728	6.38138	6.54651	5.96043	6.5692	6.70008	6.97475	6.32362	6.7579	6.94282	8.22705	7.08336	6.59311	6.64066	6.41351	7.43347	6.42936	6.31852	6.85199	6.99957	6.67242	7.02852	7.5132	6.85795	8.32475	8.73561	10.0613	9.19232	8.73805	8.87362	9.27959
213357_at	7.55301	6.74305	7.54477	8.62733	8.31999	8.64628	8.41652	7.60148	8.40874	8.91789	8.0558	7.63981	6.86002	7.50794	8.23613	8.37465	8.01296	7.81172	8.53408	8.11374	7.85511	8.50954	7.77343	7.55025	7.47561	7.62644	6.96558	8.19438	7.61119	7.62574	7.29789	8.02093	7.17409	7.26219	7.27415	7.43847	7.17369	7.67923	8.14191	7.19934	7.57272	6.91399	11.6444	11.5862	10.5501	10.2798	12.0178	10.2737	10.8095
201401_s_at	6.82152	6.76034	6.34155	6.95814	6.33136	7.07273	6.19392	6.49374	5.65655	5.35722	5.85004	6.91584	6.29736	6.49354	5.60419	6.98773	6.1232	6.53029	5.86238	5.39214	5.99767	6.00499	6.12064	6.82115	6.15814	6.40372	6.40816	5.65258	5.82442	6.15851	5.61239	6.14097	5.37687	6.20551	5.69709	5.9436	6.32008	6.52774	6.6837	6.29034	5.92706	6.01522	6.65327	7.32754	7.56691	7.14837	7.4097	6.93106	7.08293
214527_s_at	7.4916	8.38392	7.73197	8.1869	8.51984	8.954	8.4734	8.5515	8.63098	7.2034	7.83462	8.13864	7.45684	7.78848	7.62214	7.72108	7.47134	6.96632	7.81776	7.24238	7.26306	7.68065	6.79274	7.5581	7.8748	7.97299	7.16713	7.47418	7.38841	7.67189	6.77345	8.14127	8.02745	7.25932	7.06716	7.99357	7.95414	8.06483	7.63779	8.16544	7.31088	7.52597	7.82505	9.48964	9.28935	8.00625	8.88741	9.81116	9.36133
201692_at	8.43462	8.49118	8.61233	6.76309	8.07768	8.17051	8.6384	8.72723	9.06167	7.92618	6.97912	8.23818	8.60559	8.12775	7.94324	7.65247	7.93632	7.3945	7.91505	7.27895	8.43066	7.70092	7.24528	8.20093	7.39873	7.52436	7.93941	7.88755	7.70022	7.8299	7.83904	8.04944	7.25822	7.50057	7.37796	7.62434	7.56977	7.88444	8.15805	7.40532	7.48821	7.8077	10.2639	10.1022	9.87832	9.86242	10.268	11.7725	9.56922
[truncated: 93 more columns]
